# Supplementary material for: In situ formation of reverse polymeric micelles in liquid alkanes to lodge alcohol micro-droplets
Source: Royal Society of Chemistry journal article supplement (doi:10.1039/c4ra14210a), 2015-01-01
Supplement: c4ra14210a1.pdf [file c4ra14210a1.pdf]

**Electronic Supplementary Information**

# In-Situ Formation of Reverse Polymeric Micelles in Liquid Alkanes to Lodge Alcohol Micro-droplets

*Yeap-Hung Ng,<sup>a</sup> Siok Wei Tay,<sup>b</sup> Richard S. Hong,<sup>b</sup> Liang Hong<sup>\*a,b</sup>*

<sup>a</sup> Department of Chemical & Biomolecular Engineering, National University of Singapore, 10  
Kent Ridge Crescent, Singapore 119260, Singapore

<sup>b</sup> Institute of Materials Research and Engineering, 3 Research Link, Singapore 117602,  
Singapore

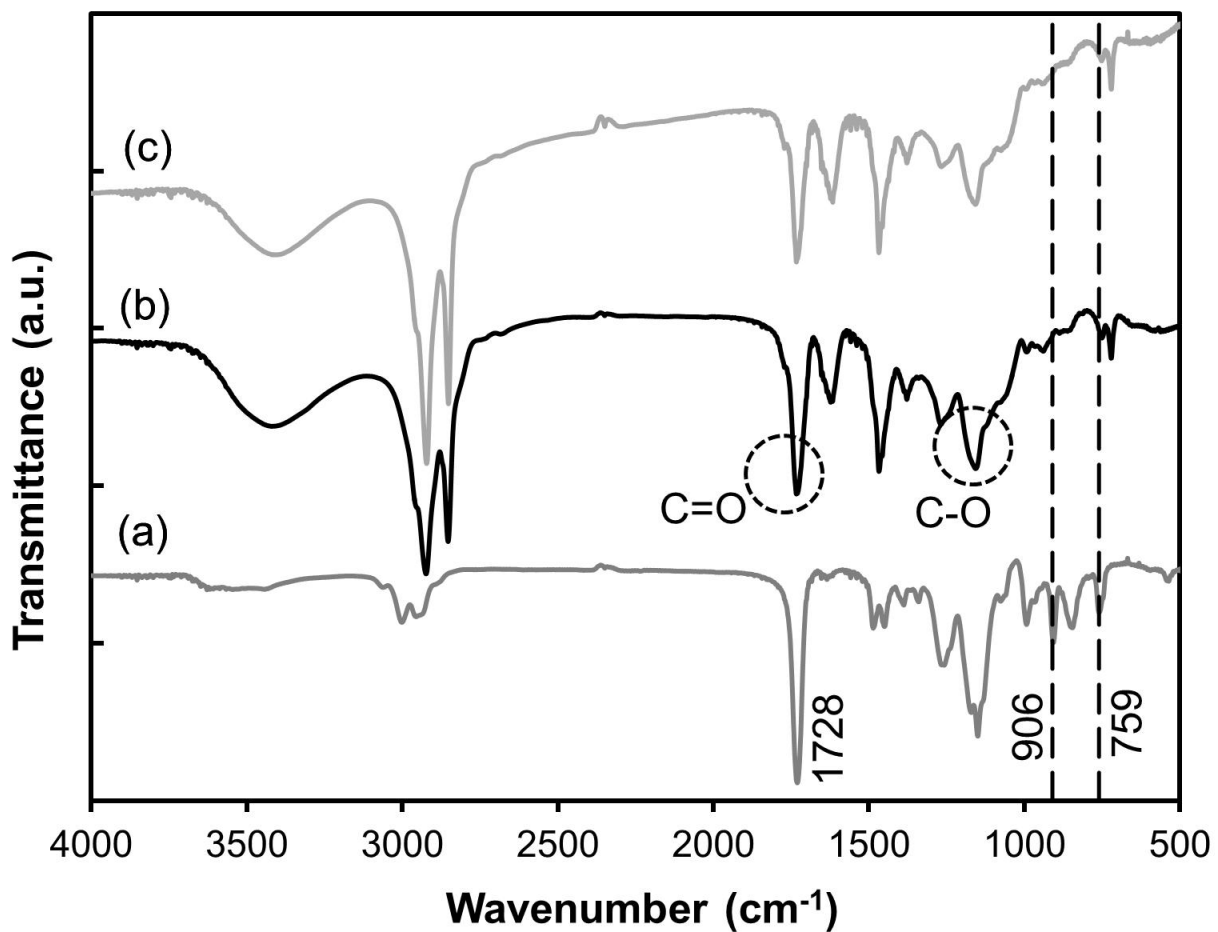

**Fig. S1** FTIR spectra of purified polymer species (a) PGMA, (b) P(HDA-GMA), Sample P1 synthesized in *n*-dodecane, and (c) P(ODA-GMA), Sample P5 synthesized in the diesel.

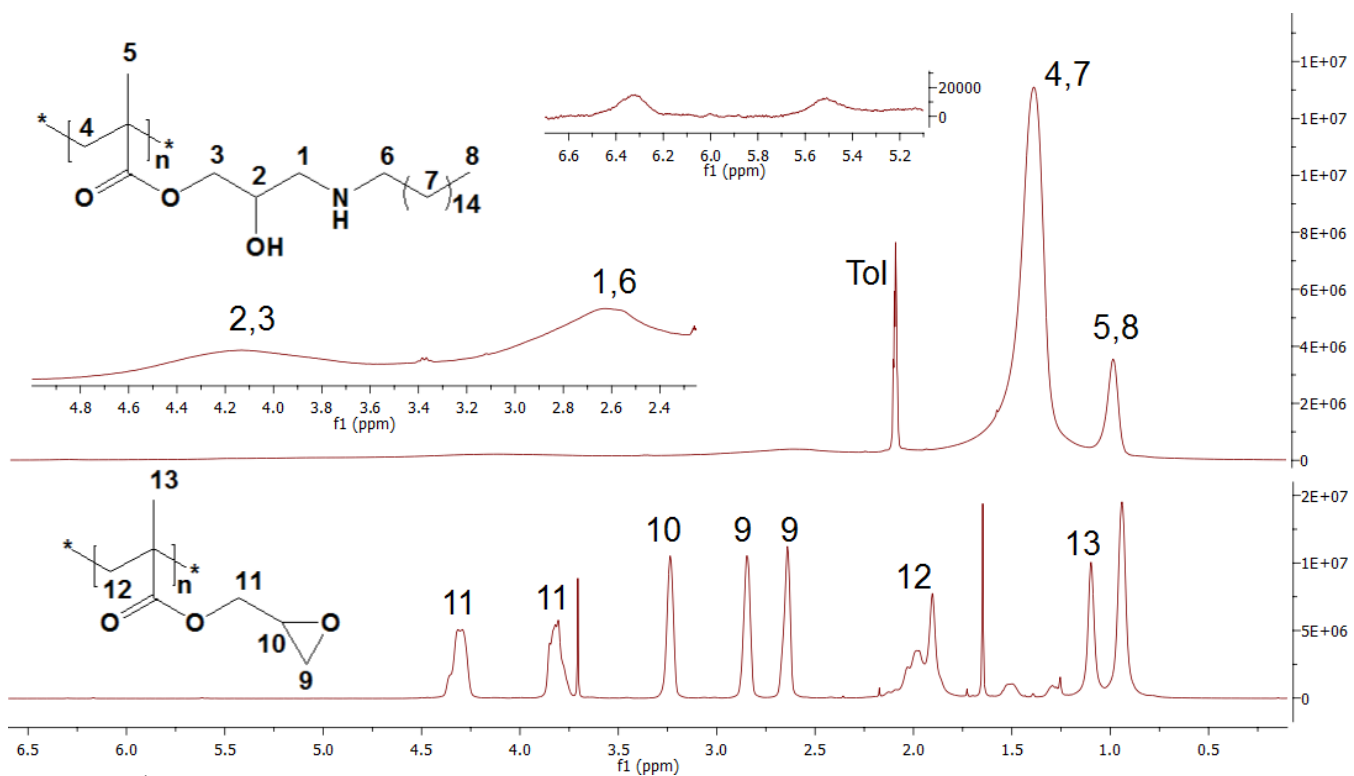

**Fig. S2** <sup>1</sup>H-NMR spectrum of purified PGMA (in CDCl<sub>3</sub>) and P(GMA-HDA) (in toluene-*d*<sub>8</sub>).

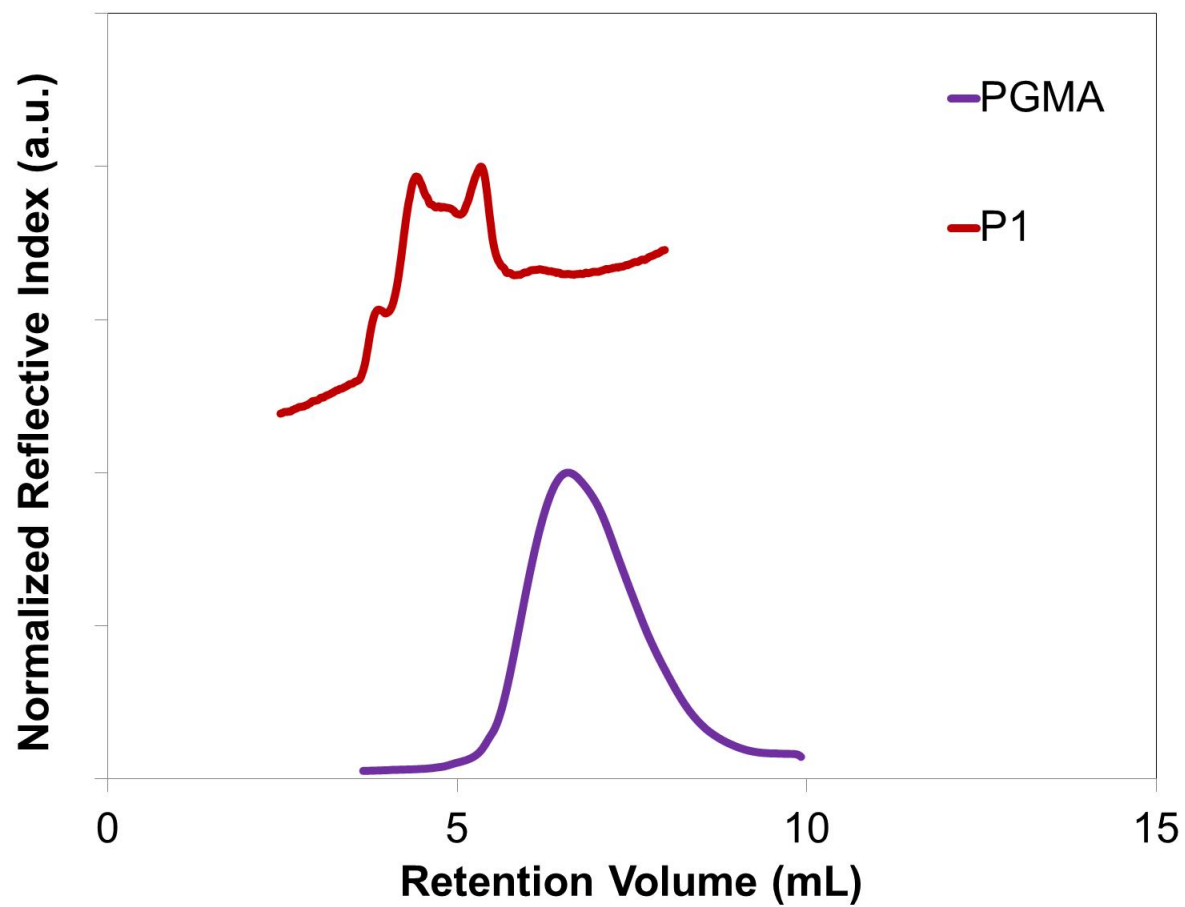

**Fig. S3** Size exclusion chromatograph for homopolymer PGMA and comb-like amphiphilic polymer P1 using DMF as eluent.

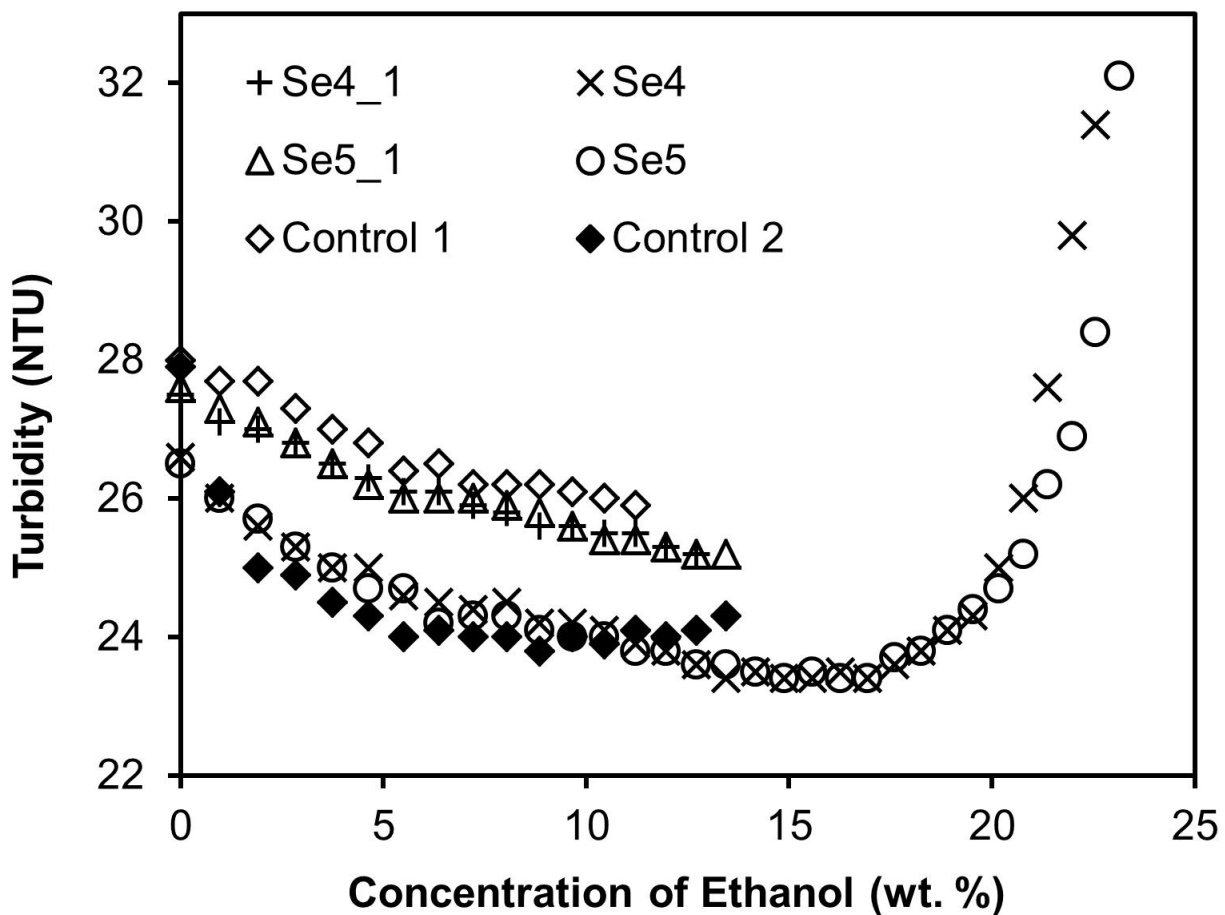

**Fig. S4** The variation of turbidity with the addition of ethanol into the four reverse polymeric micellar solutions and the two controls where the diesel is the dispersion medium (refer to Table 3 for labels).

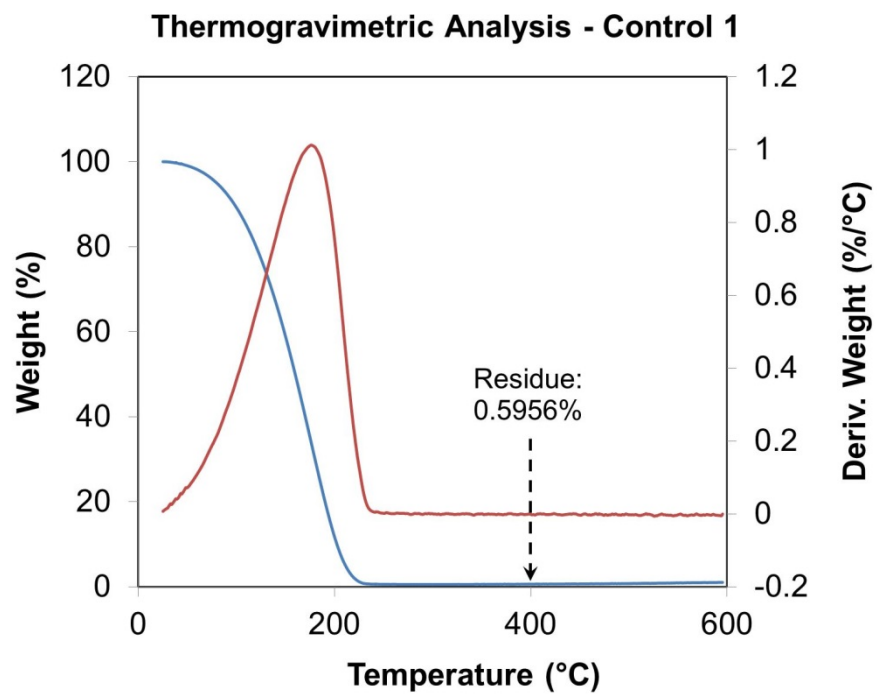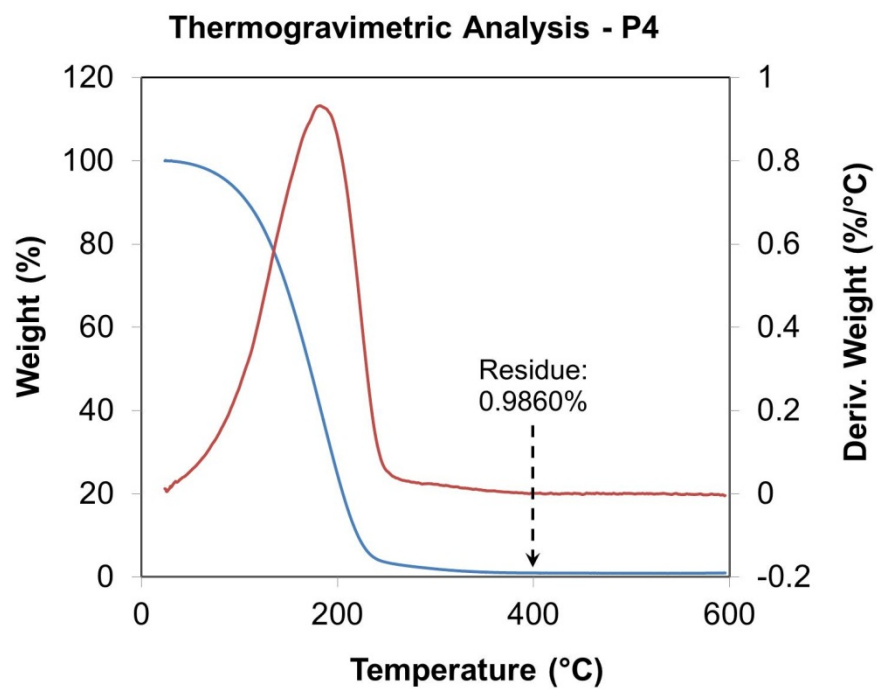

Fig.

S5

The pyrolysis profiles of Control 1 (Top, pristine diesel) and sample P4 (Bottom, polymer micellar solution with 5 wt.% emulsifier).

**Table S1** Tabulated turbidity measurement data for the dissolution of methanol in the polymeric reverse micellar solution

| Methanol<br>(wt. %) | Turbidity (NTU) |                 |                 |                 |                 |                 |                 |                 |                 |
|---------------------|-----------------|-----------------|-----------------|-----------------|-----------------|-----------------|-----------------|-----------------|-----------------|
|                     | S <sub>m1</sub> | S <sub>m2</sub> | S <sub>m3</sub> | S <sub>m4</sub> | S <sub>m5</sub> | S <sub>m6</sub> | S <sub>m7</sub> | S <sub>m8</sub> | S <sub>m9</sub> |
| 0.00                | 1.65            | 2.01            | 7.41            | 27.1            | 27.1            | 26.9            | 33.3            | 27.1            | 30.4            |
| 0.24                | 1.50            | 1.76            | 6.57            | 26.9            | 26.8            | 27              | 31.2            | 27.1            | 29.4            |
| 0.48                | 1.30            | 1.57            | 5.86            | 26.9            | 26.8            | 26.7            | 29.5            | 26.9            | 28.2            |
| 0.73                | 1.23            | 1.36            | 5.37            | 26.8            | 26.7            | 26.6            | 28.1            | 26.9            | 27.4            |
| 0.97                | 1.10            | 1.25            | 4.95            | 26.5            | 26.5            | 26.3            | 27.1            | 26.8            | 26.7            |
| 1.20                | 0.99            | 1.13            | 4.60            | 26.4            | 26.3            | 26.1            | 26.7            | 26.6            | 26.8            |
| 1.44                | 0.92            | 1.04            | 4.29            | 26.2            | 26.4            | 26.1            | 27.1            | 26.4            | 27.7            |
| 1.68                | 0.83            | 0.93            | 4.07            | 26.3            | 26.1            | 25.8            | 26.4            | 26.3            | 31.5            |
| 1.91                | 0.79            | 0.88            | 3.88            | 26.0            | 26.1            | 25.9            | 27.7            | 26.2            | 40.6            |
| 2.15                | 0.74            | 0.81            | 3.67            | 26.0            | 26.1            | 26.0            | 30.5            | 26.3            | 57.4            |
| 2.38                | 0.75            | 0.70            | 3.51            | 26.0            | 26.2            | 25.9            | 33.4            | 26.2            | 61.5            |
| 2.61                | 0.72            | 0.72            | 3.38            | 26.0            | 26.0            | 26.0            |                 | 26.2            | 79.3            |
| 2.84                | 0.61            | 0.71            | 3.32            | 26.0            | 26.1            | 26.0            |                 | 26.5            |                 |
| 3.07                | 0.58            | 0.71            | 3.22            | 25.9            | 25.9            | 800             |                 | 26.6            |                 |
| 3.30                | 0.57            | 0.70            | 6.17            | 1194            | 1091            |                 |                 | 1246            |                 |
| 3.53                | 0.60            | 5.50            |                 |                 |                 |                 |                 |                 |                 |
| 3.75                | 2.01            |                 |                 |                 |                 |                 |                 |                 |                 |

Shaded area: Turbidity at phase separation

**Table S2** Tabulated turbidity measurement data for the dissolution of ethanol in the polymeric reverse micellar solution

| EtOH<br>(wt. %) | Turbidity (NTU) |      |                    |                      |                  |                    |                      |                  |                  |                  |                  |                  |
|-----------------|-----------------|------|--------------------|----------------------|------------------|--------------------|----------------------|------------------|------------------|------------------|------------------|------------------|
|                 | C1              | C2   | S <sub>e</sub> 4_1 | S <sub>e</sub> 4_2.5 | S <sub>e</sub> 4 | S <sub>e</sub> 5_1 | S <sub>e</sub> 5_2.5 | S <sub>e</sub> 5 | S <sub>e</sub> 6 | S <sub>e</sub> 7 | S <sub>e</sub> 8 | S <sub>e</sub> 9 |
| 0.00            | 28.0            | 27.9 | 27.5               | 27.1                 | 26.6             | 27.6               | 27.0                 | 26.5             | 26.7             | 33.3             | 27.3             | 30.2             |
| 0.96            | 27.7            | 26.1 | 27.1               | 26.7                 | 26.0             | 27.3               | 26.7                 | 26.0             | 26.1             | 29.4             | 26.8             | 27.8             |
| 1.91            | 27.7            | 25.0 | 27.0               | 26.5                 | 25.6             | 27.1               | 26.6                 | 25.7             | 25.6             | 27.5             | 26.3             | 26.4             |
| 2.83            | 27.3            | 24.9 | 26.8               | 26.2                 | 25.3             | 26.8               | 26.1                 | 25.3             | 25.5             | 26.5             | 26.2             | 25.9             |
| 3.74            | 27.0            | 24.5 | 26.5               | 26.0                 | 25.0             | 26.5               | 25.8                 | 25.0             | 25.2             | 25.6             | 25.8             | 25.5             |
| 4.63            | 26.8            | 24.3 | 26.3               | 25.9                 | 25.0             | 26.2               | 25.7                 | 24.7             | 24.9             | 25.6             | 25.6             | 25.3             |
| 5.51            | 26.4            | 24.0 | 26.1               | 25.5                 | 24.6             | 26.0               | 25.4                 | 24.7             | 24.8             | 25.7             | 25.3             | 25.5             |
| 6.36            | 26.5            | 24.1 | 26.1               | 25.1                 | 24.5             | 26.0               | 25.2                 | 24.2             | 24.4             | 25.2             | 25.0             | 26.4             |
| 7.21            | 26.2            | 24.0 | 25.9               | 25.3                 | 24.4             | 26.0               | 25.2                 | 24.3             | 24.4             | 24.9             | 24.9             | 28.0             |
| 8.04            | 26.2            | 24.0 | 25.8               | 25.2                 | 24.5             | 25.9               | 25.1                 | 24.3             | 24.2             | 24.8             | 24.7             | 29.3             |
| 8.85            | 26.2            | 23.8 | 25.6               | 25.1                 | 24.2             | 25.8               | 24.9                 | 24.1             | 24.1             | 25.0             | 24.6             | 31.1             |
| 9.65            | 26.1            | 24.0 | 25.6               | 25.0                 | 24.2             | 25.6               | 24.9                 | 24.0             | 23.9             | 25.3             | 24.4             | 32.8             |
| 10.44           | 26.0            | 23.9 | 25.5               | 24.7                 | 24.1             | 25.4               | 25.0                 | 24.0             | 24.0             | 25.6             | 24.4             | 33.1             |
| 11.21           | 25.9            | 24.1 | 25.5               | 24.8                 | 23.9             | 25.4               | 24.6                 | 23.8             | 23.8             | 25.8             | 24.1             | 32.3             |
| 11.97           | 1254            | 24.0 | 25.3               | 24.5                 | 23.8             | 25.3               | 24.6                 | 23.8             | 23.7             | 27.1             | 24.2             | 31.6             |
| 12.71           |                 | 24.1 | 25.2               | 24.5                 | 23.6             | 25.2               | 24.5                 | 23.6             | 23.7             | 26.5             | 24.0             | 29.8             |
| 13.45           |                 | 24.3 | 806                | 24.3                 | 23.4             | 25.2               | 24.4                 | 23.6             | 23.7             | 942              | 24.0             | 28.9             |
| 14.17           |                 | 1068 |                    | 24.6                 | 23.5             | 938                | 24.5                 | 23.5             | 24.2             |                  | 24.3             | 26.4             |
| 14.88           |                 |      |                    | 24.6                 | 23.4             |                    | 24.5                 | 23.4             | 23.9             |                  | 24.2             | 26.3             |
| 15.58           |                 |      |                    | 24.7                 | 23.4             |                    | 24.7                 | 23.5             | 24.2             |                  | 24.3             | 26.5             |
| 16.26           |                 |      |                    | 24.8                 | 23.5             |                    | 24.8                 | 23.4             | 24.7             |                  | 24.5             | 27.6             |
| 16.94           |                 |      |                    | 1377                 | 23.4             |                    | 1368                 | 23.4             | 24.7             |                  | 24.6             | 28.0             |



|       |      |      |      |      |     |
|-------|------|------|------|------|-----|
| 17.60 | 23.6 | 23.7 | 26.8 | 25.1 | 919 |
| 18.26 | 23.8 | 23.8 | 27.3 | 25.5 |     |
| 18.90 | 24.1 | 24.1 | 28.0 | 25.7 |     |
| 19.53 | 24.3 | 24.4 | 29.3 | 26.3 |     |
| 20.16 | 25.0 | 24.7 | 1957 | 1669 |     |
| 20.77 | 26.0 | 25.2 |      |      |     |
| 21.38 | 27.6 | 26.2 |      |      |     |
| 21.97 | 29.8 | 26.9 |      |      |     |
| 22.56 | 31.4 | 28.4 |      |      |     |
| 23.14 | 2522 | 32.1 |      |      |     |
| 23.71 |      | 2394 |      |      |     |

---

Shaded area: Turbidity at phase separation

---
